# Supplementary material for: Interventions with Digital Tools for Mental Health Promotion among 11–18 Year Olds: A Systematic Review and Meta-Analysis
Source: Springer Nature journal article supplement (doi:10.1007/s10964-023-01735-4), 2023-02-08

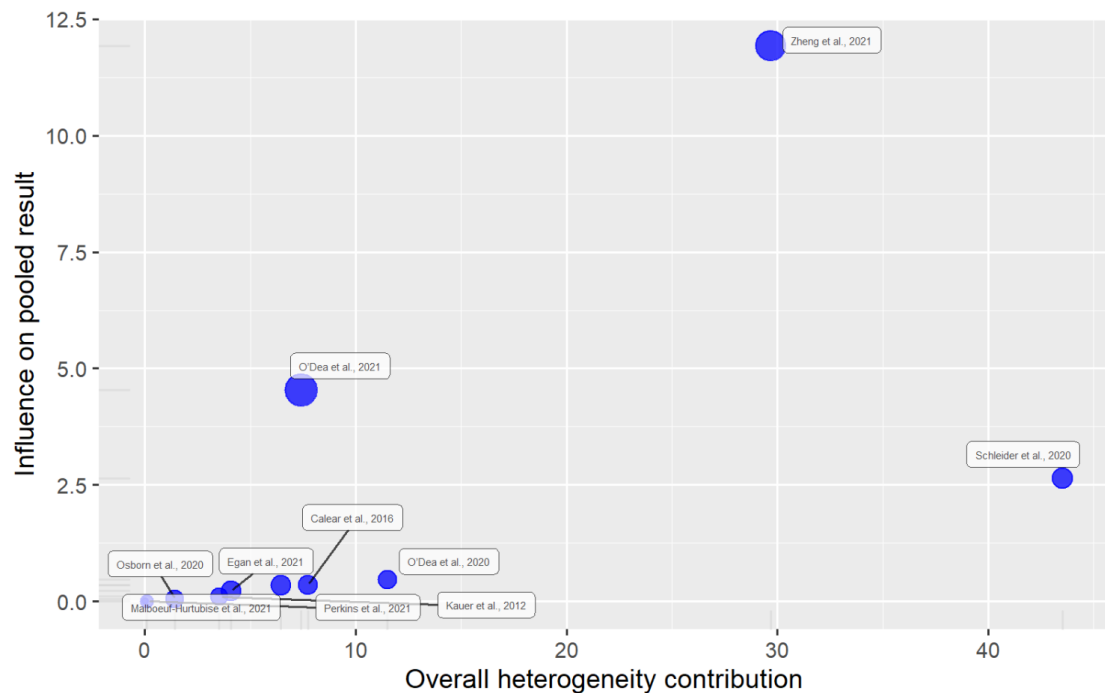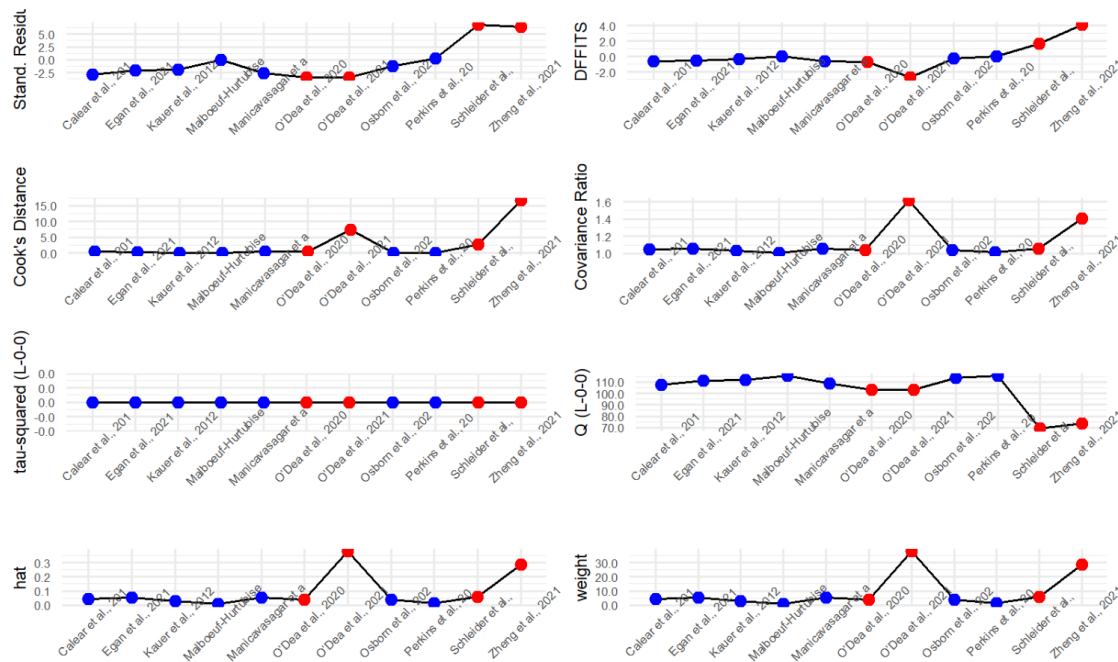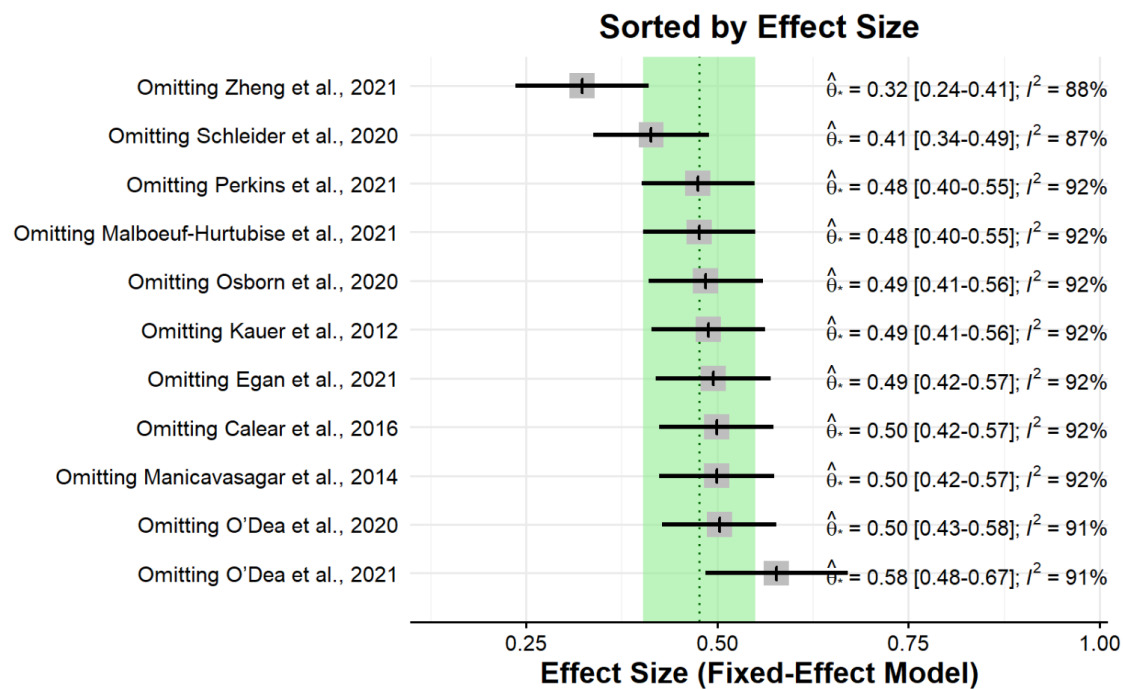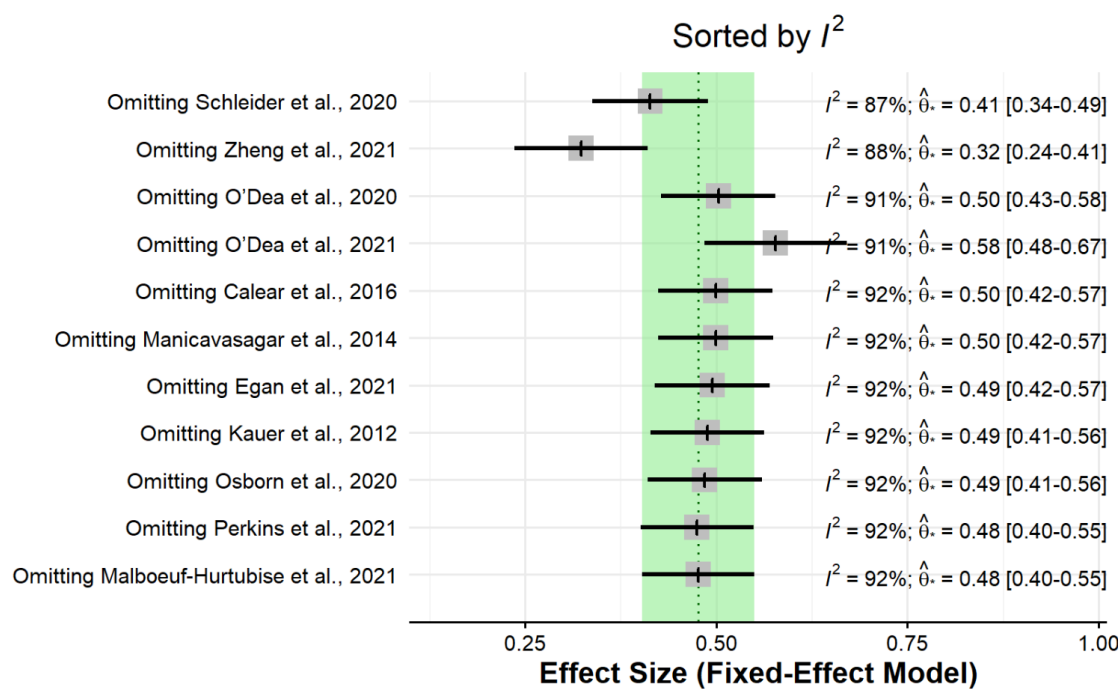

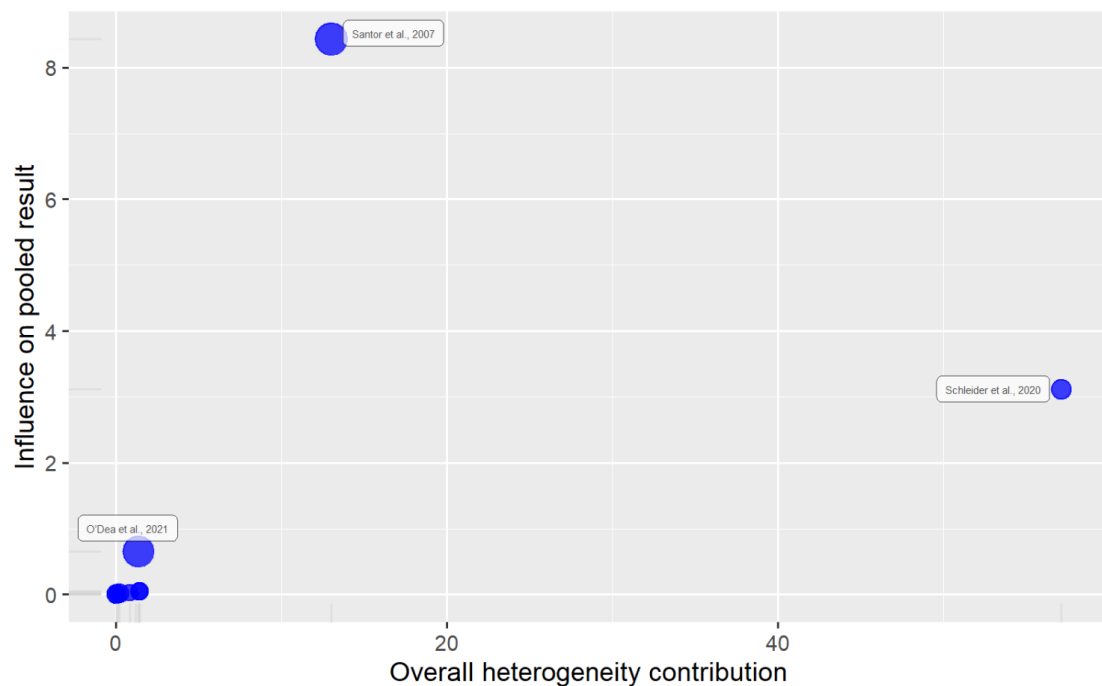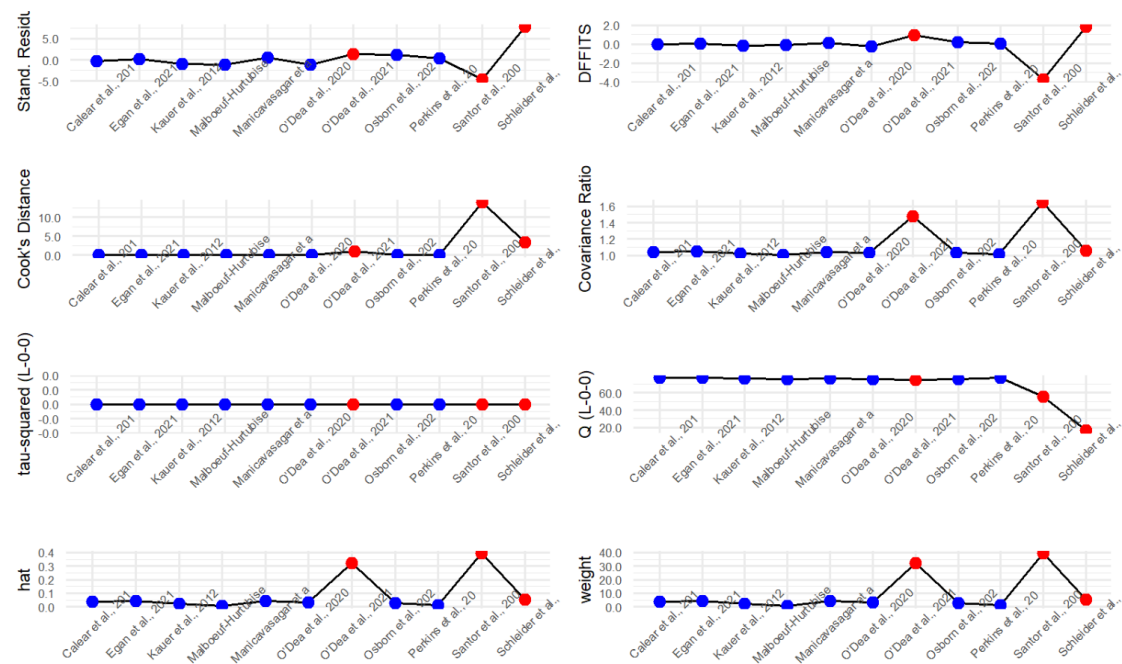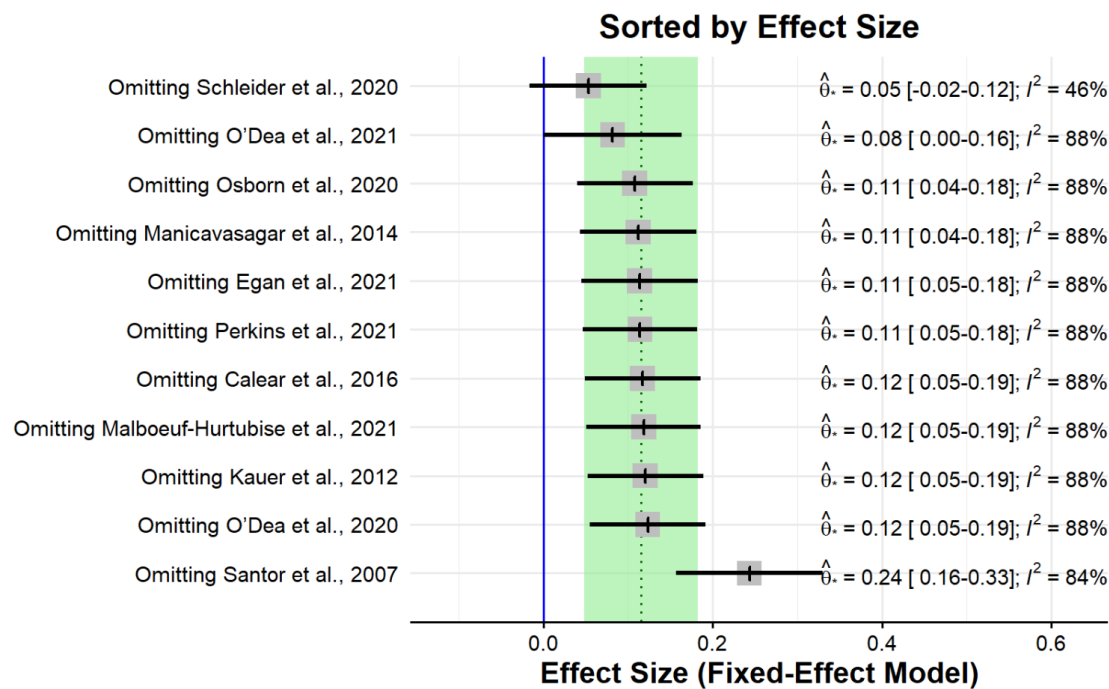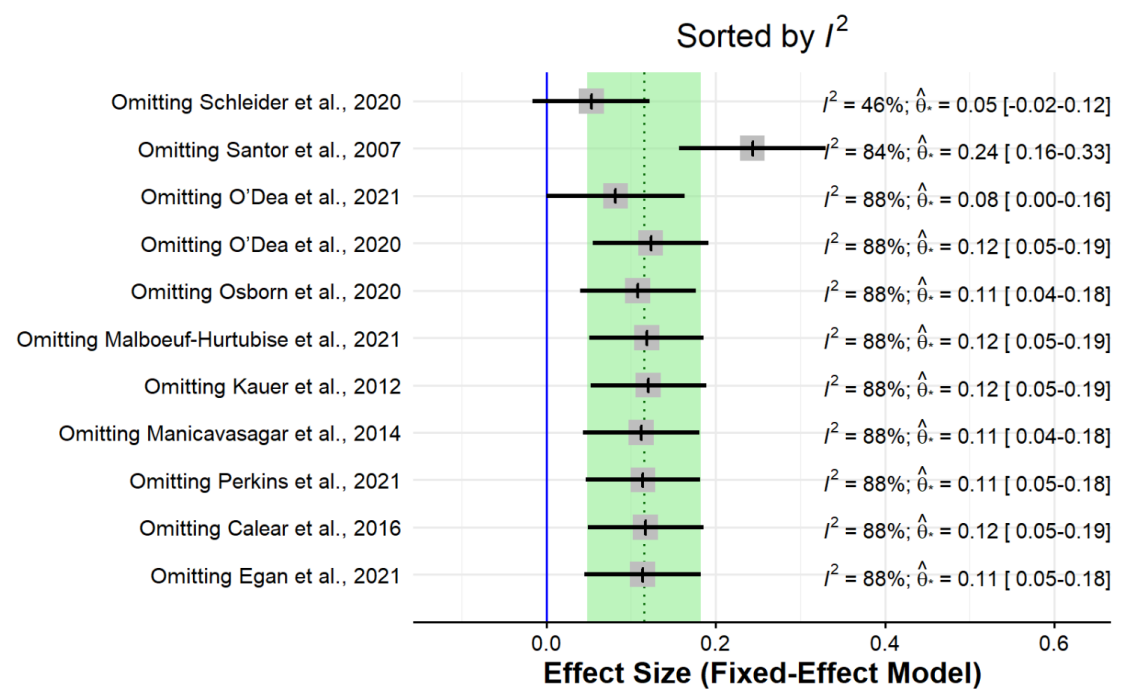

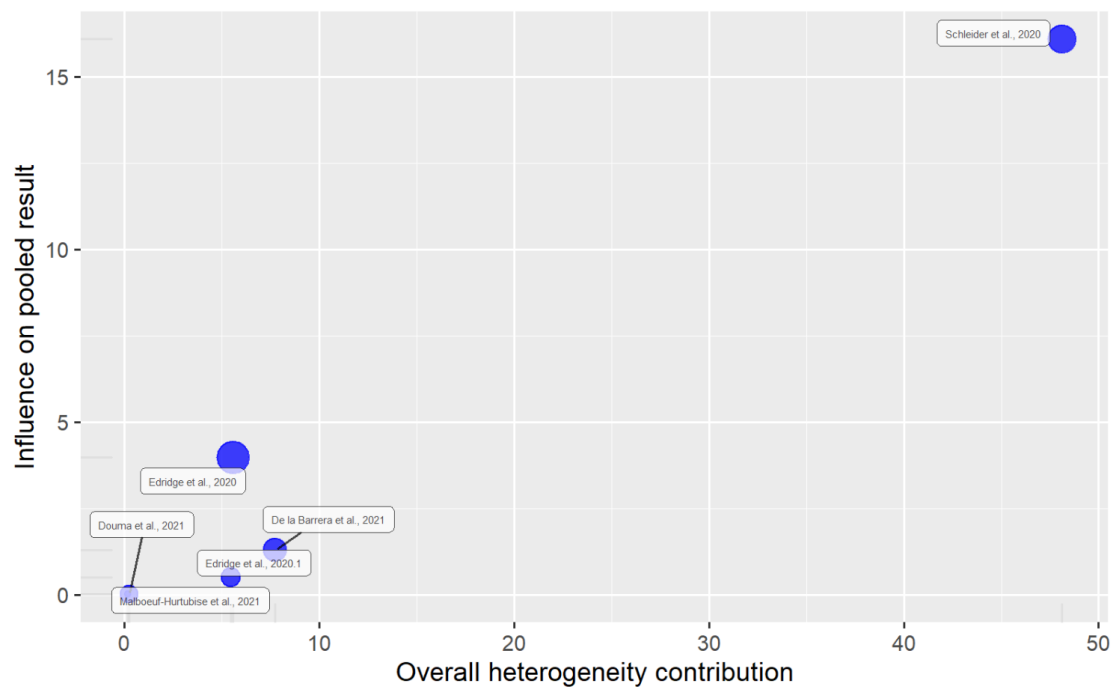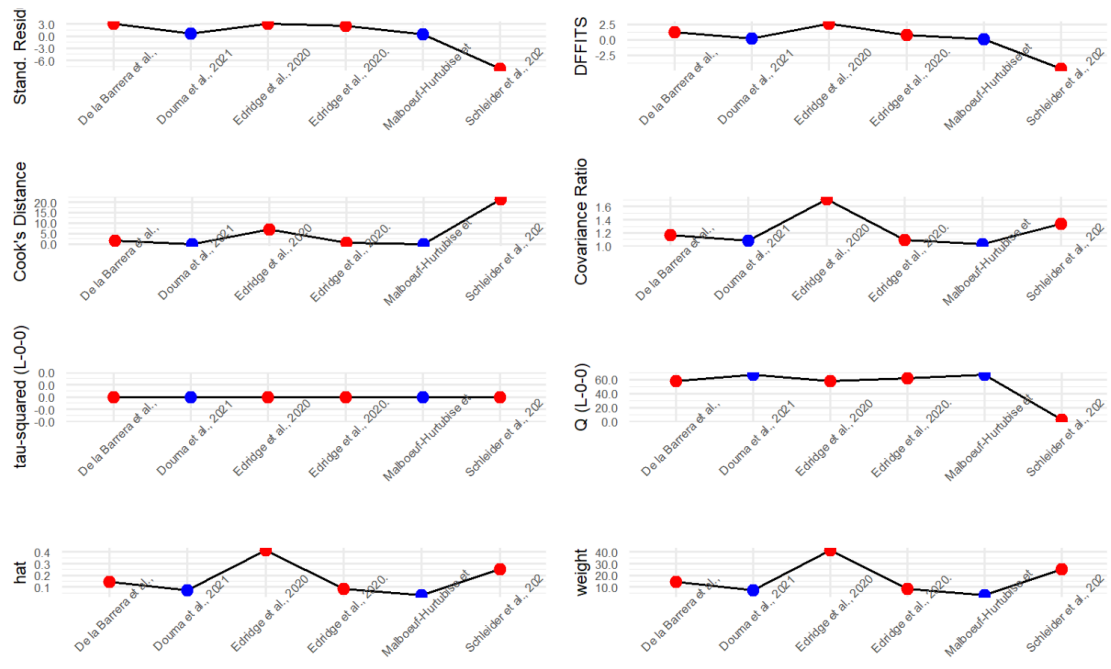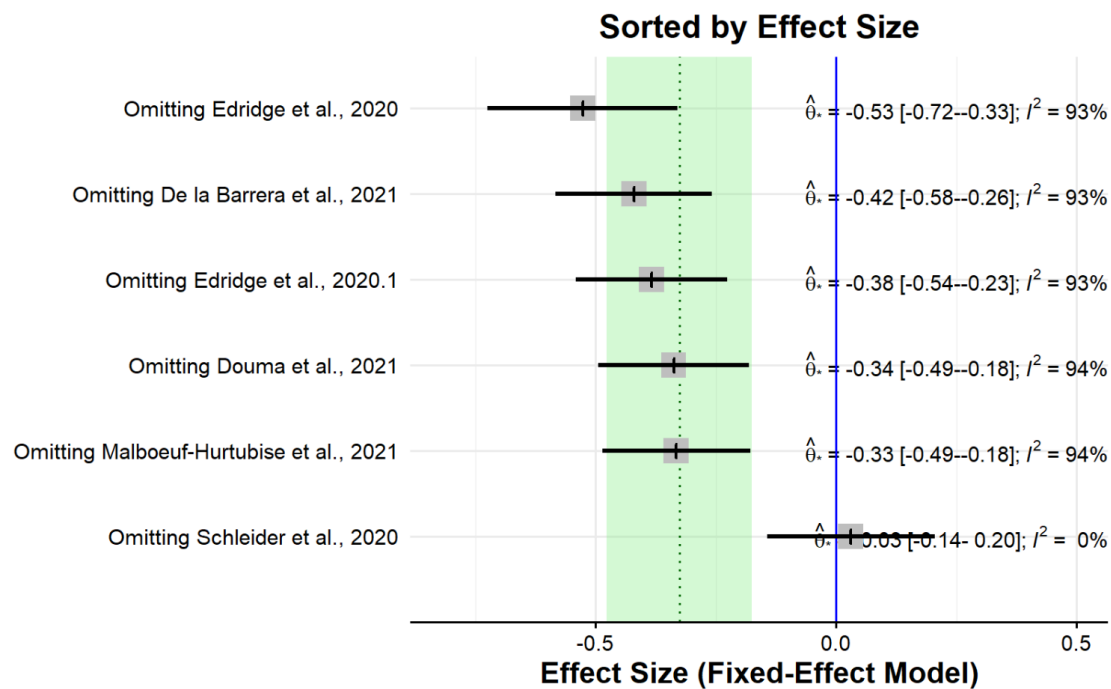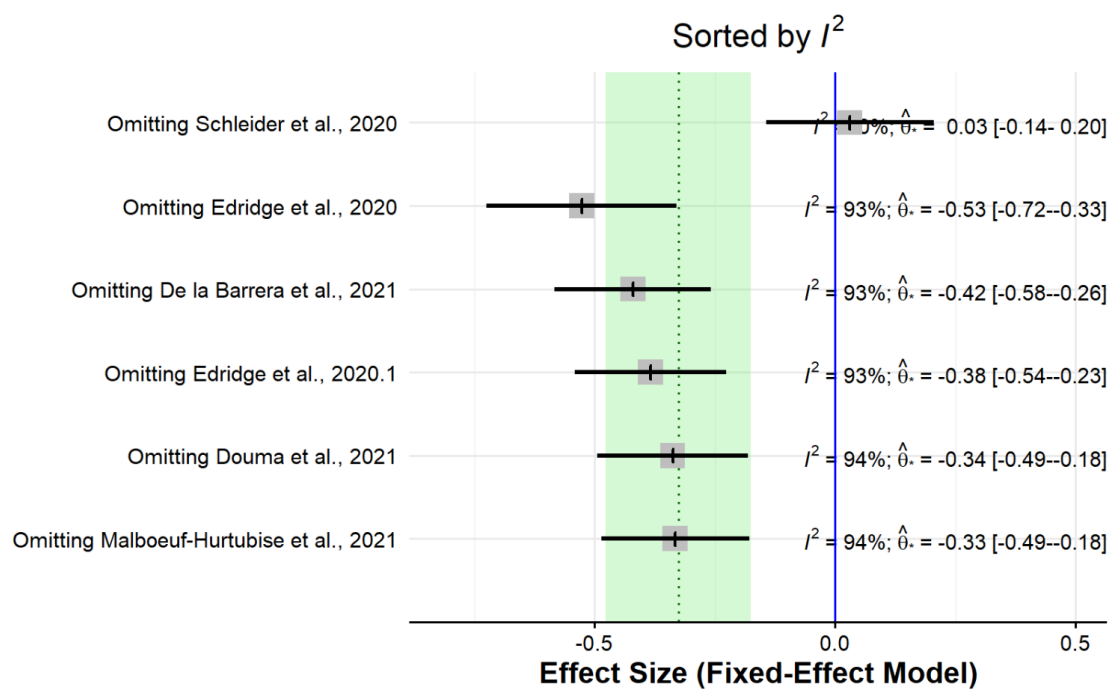

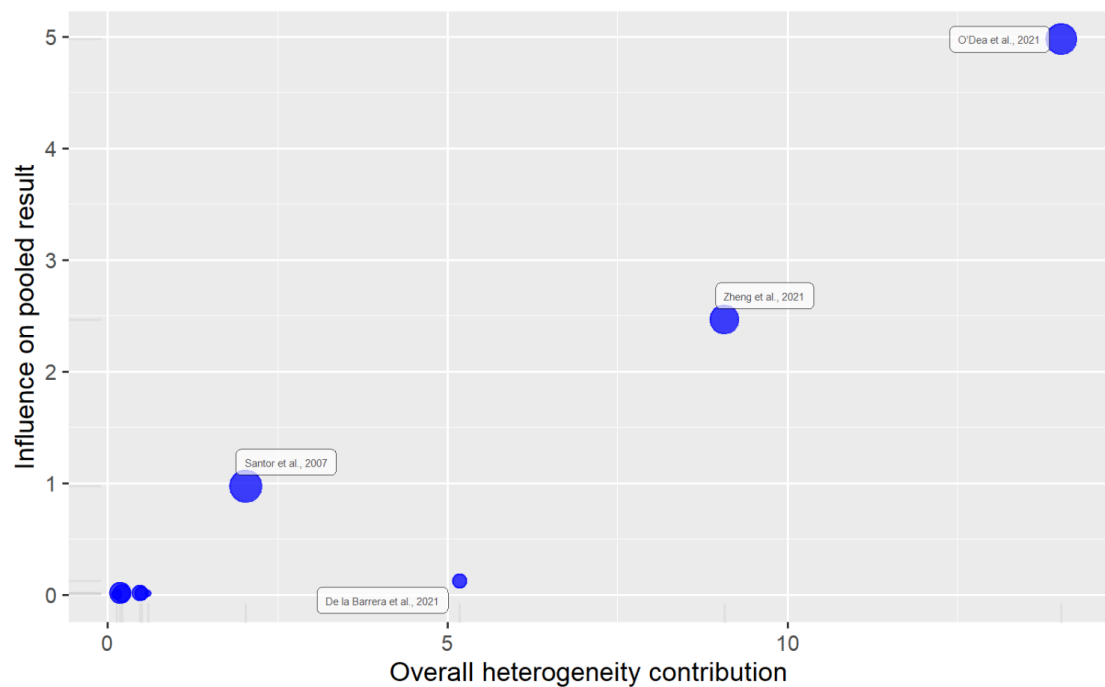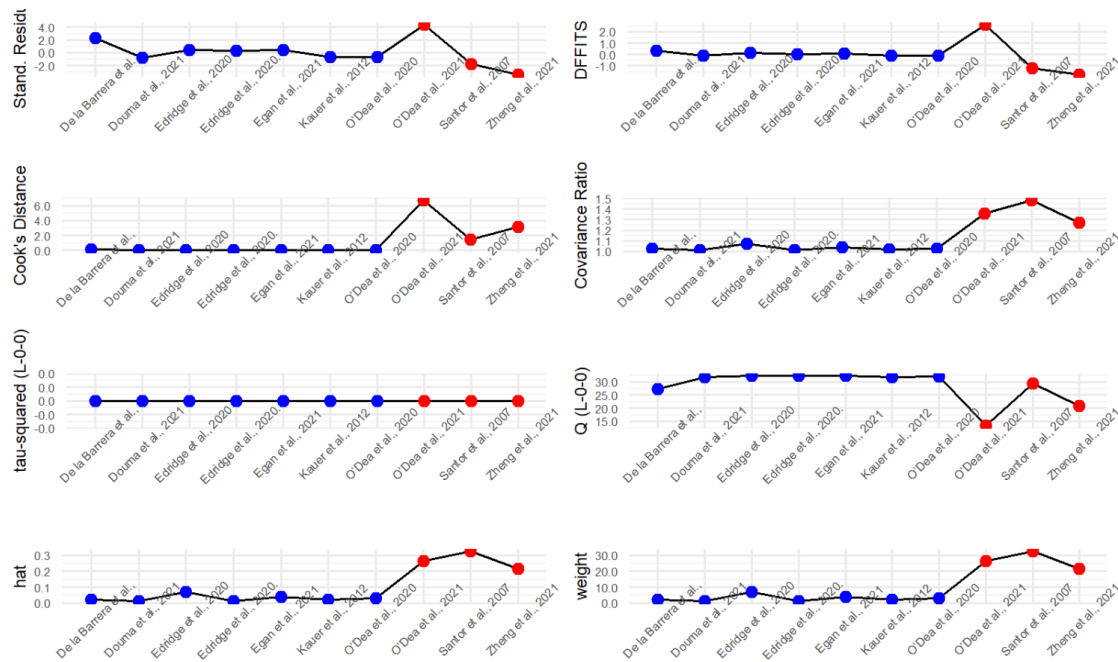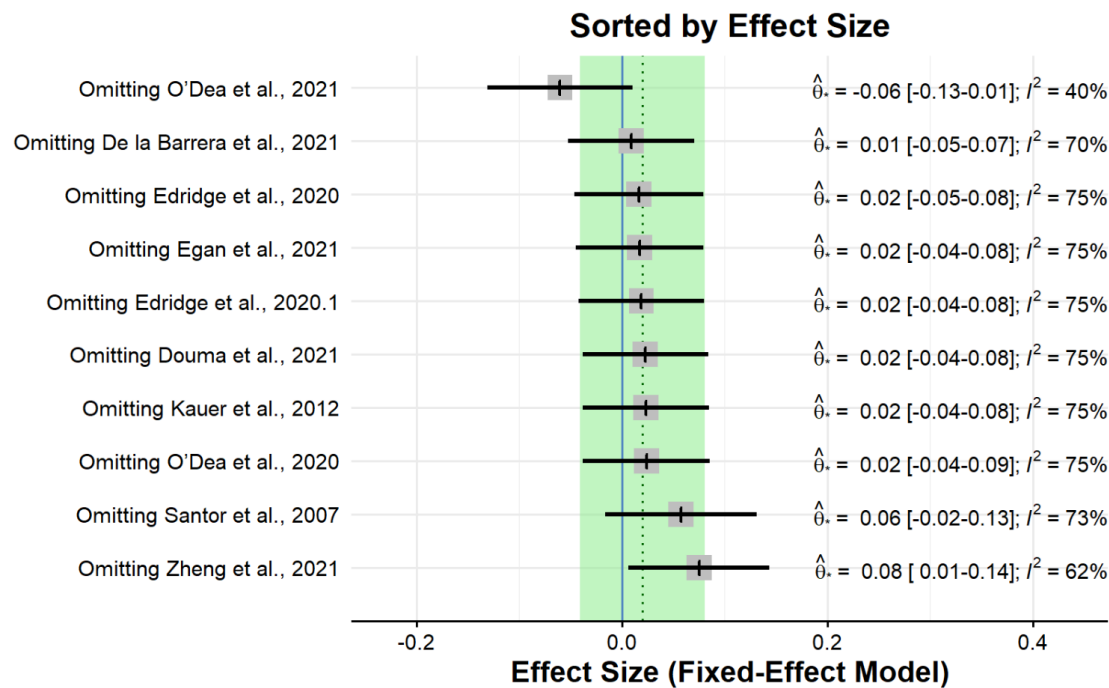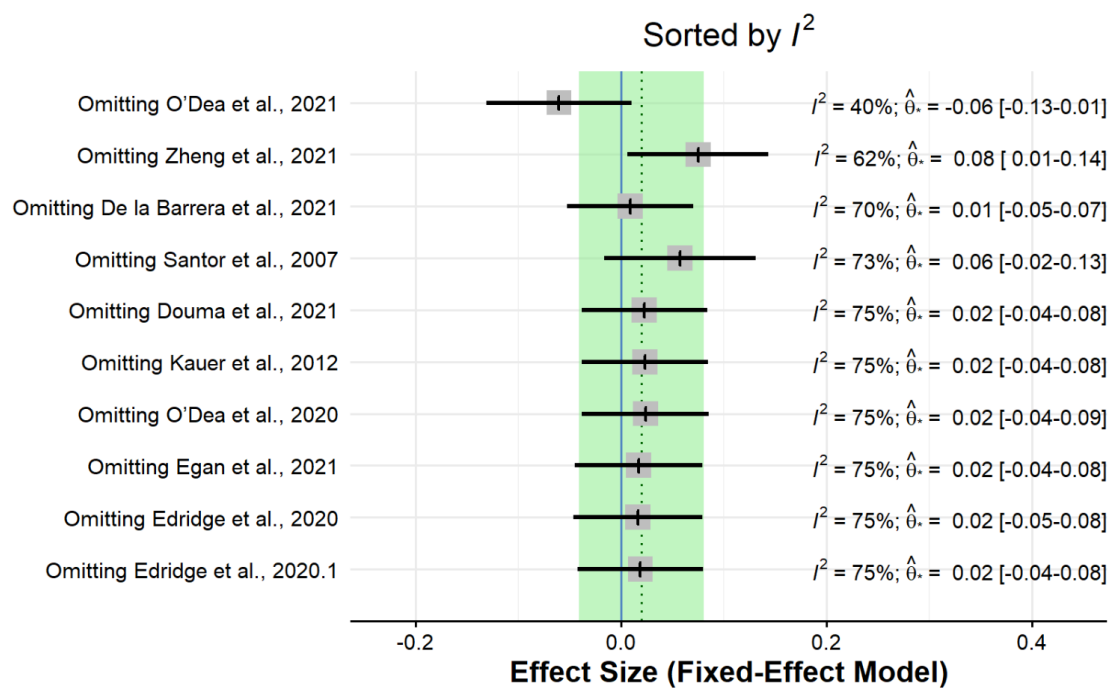

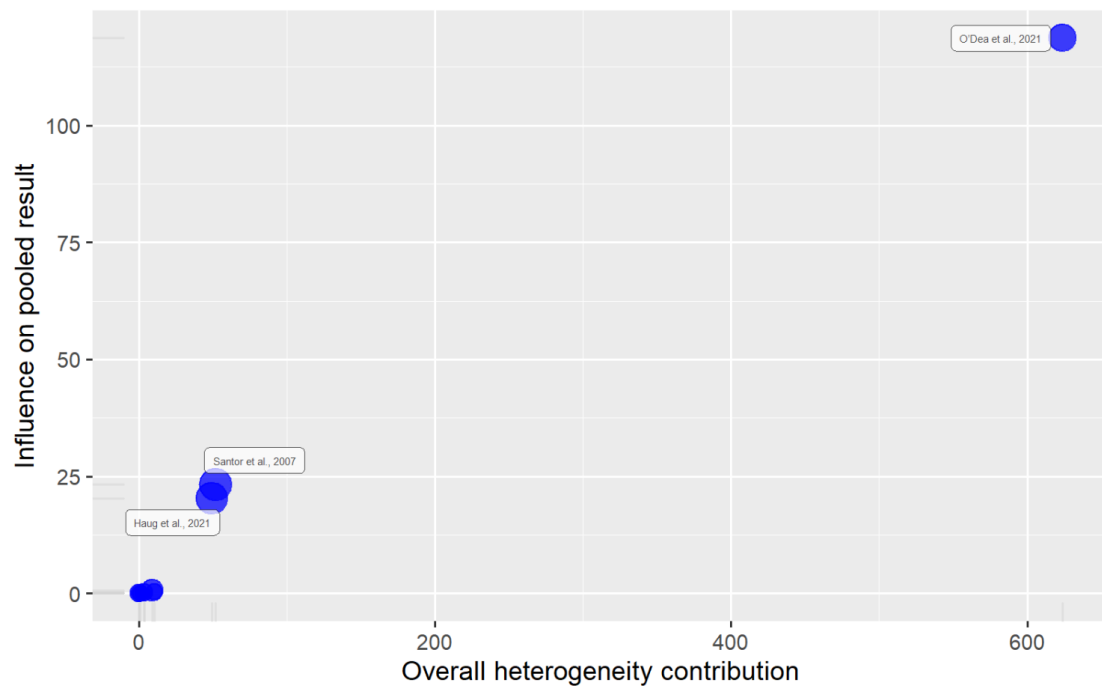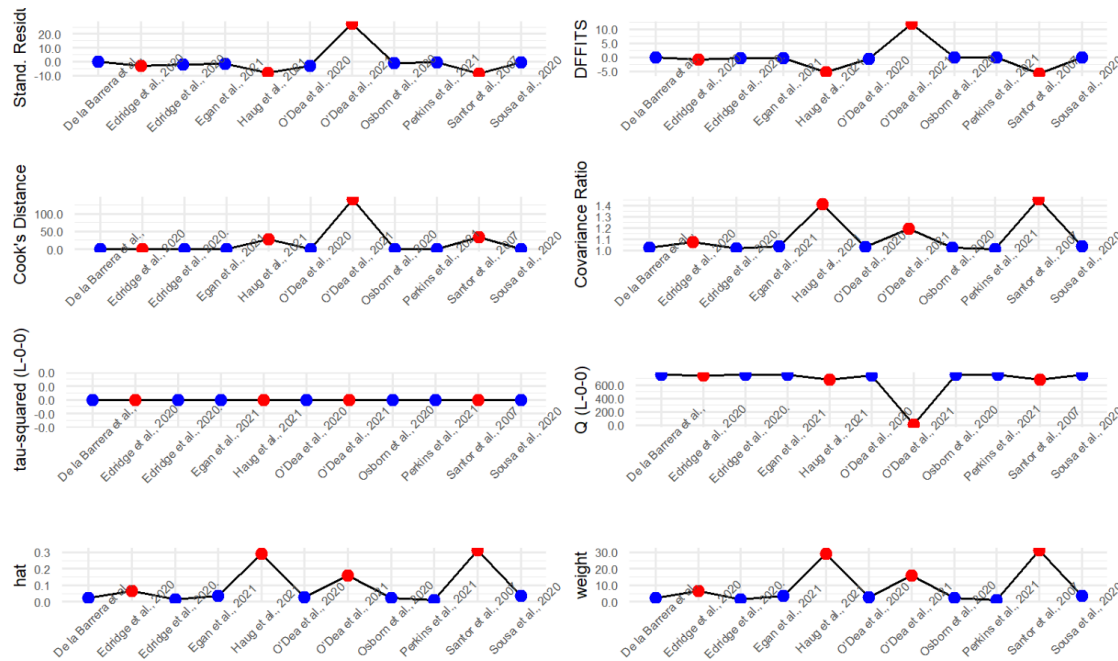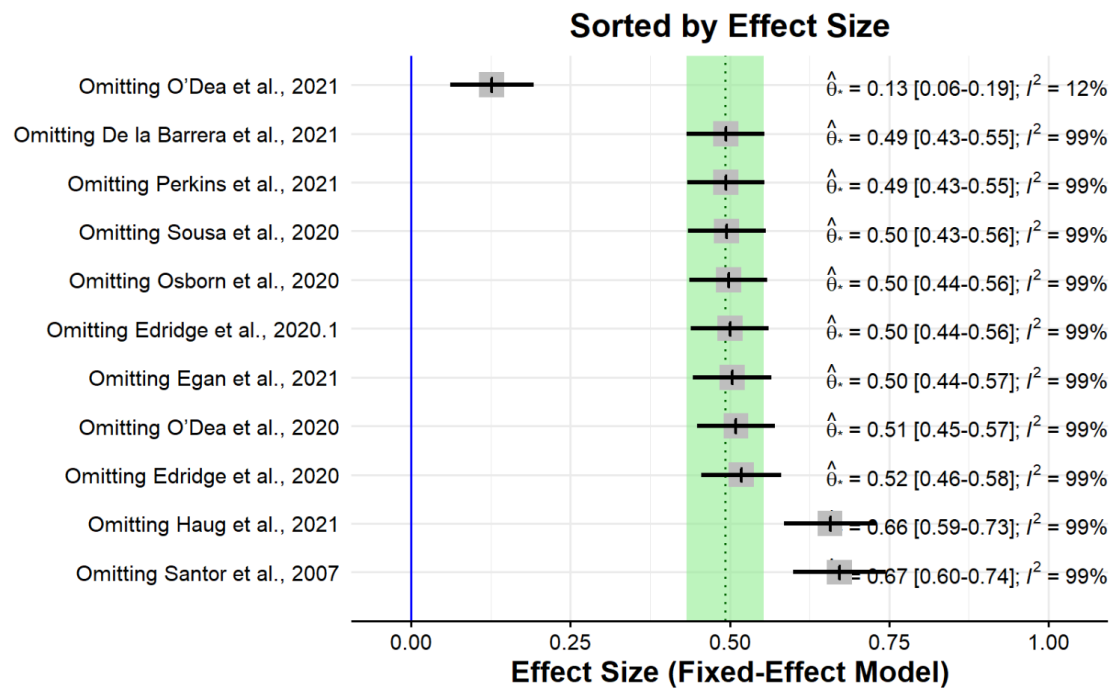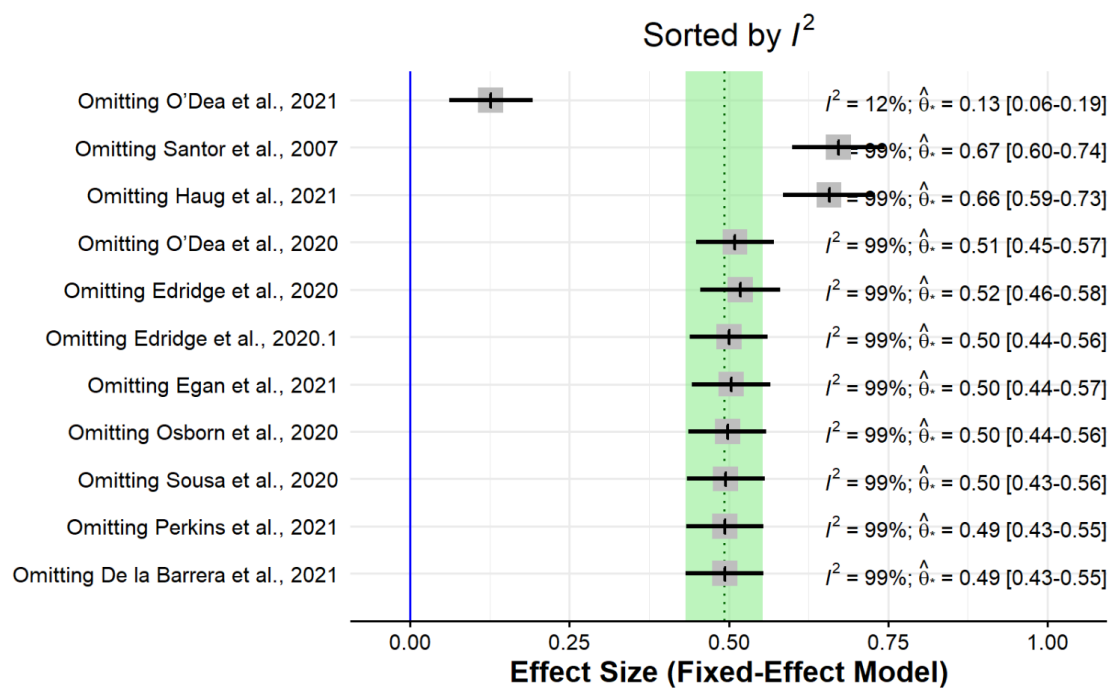

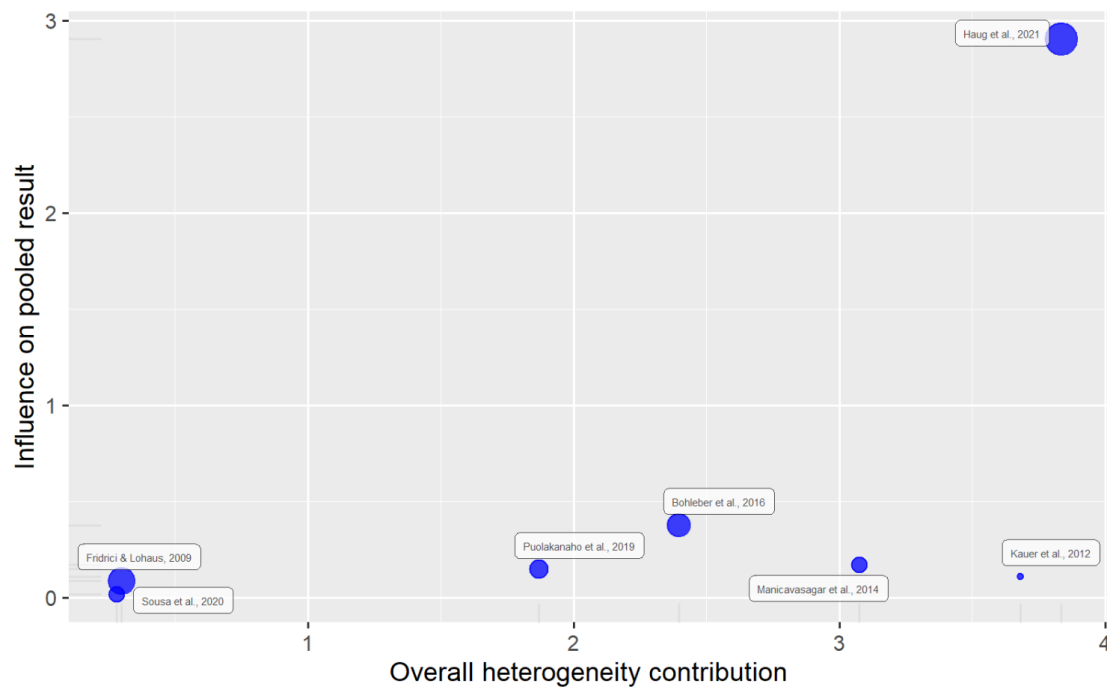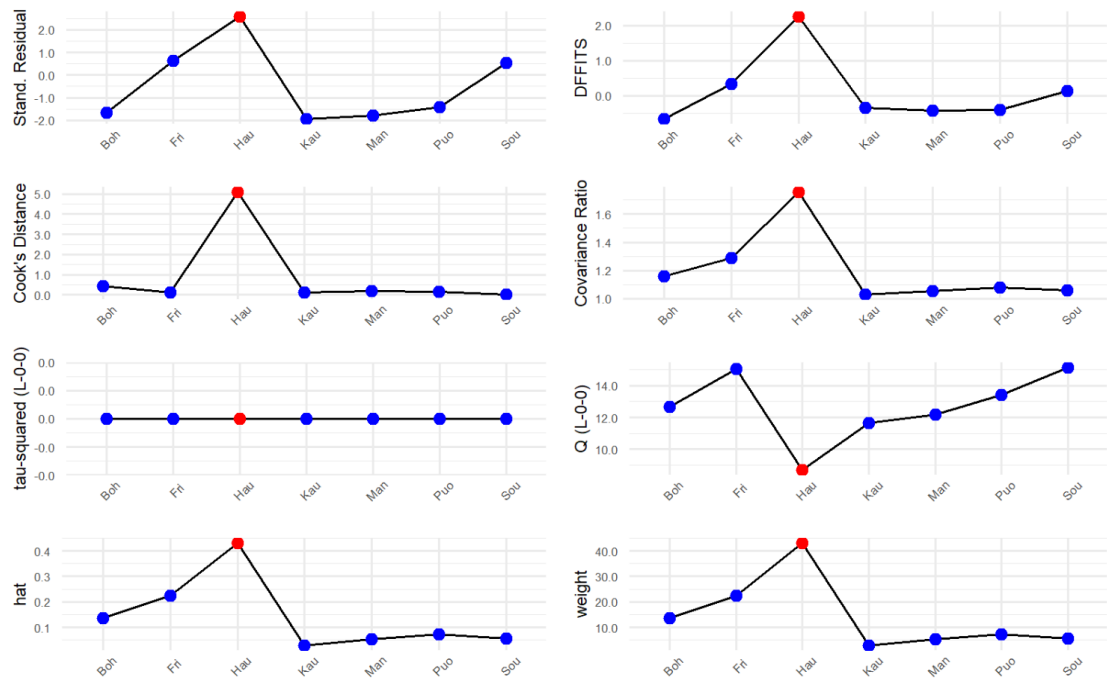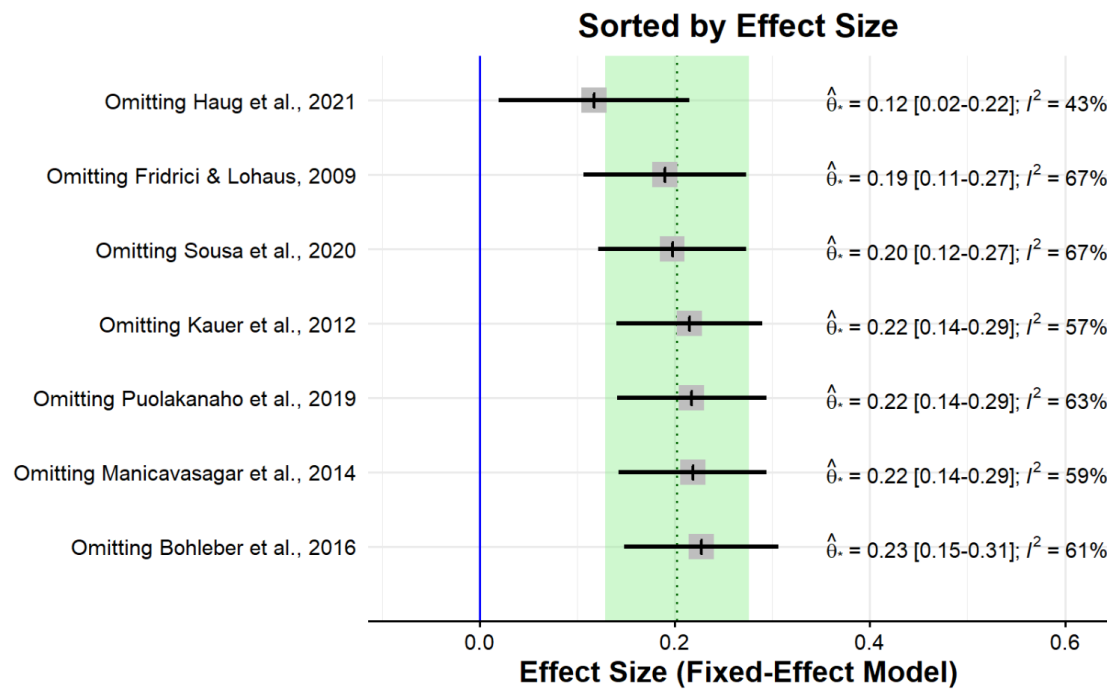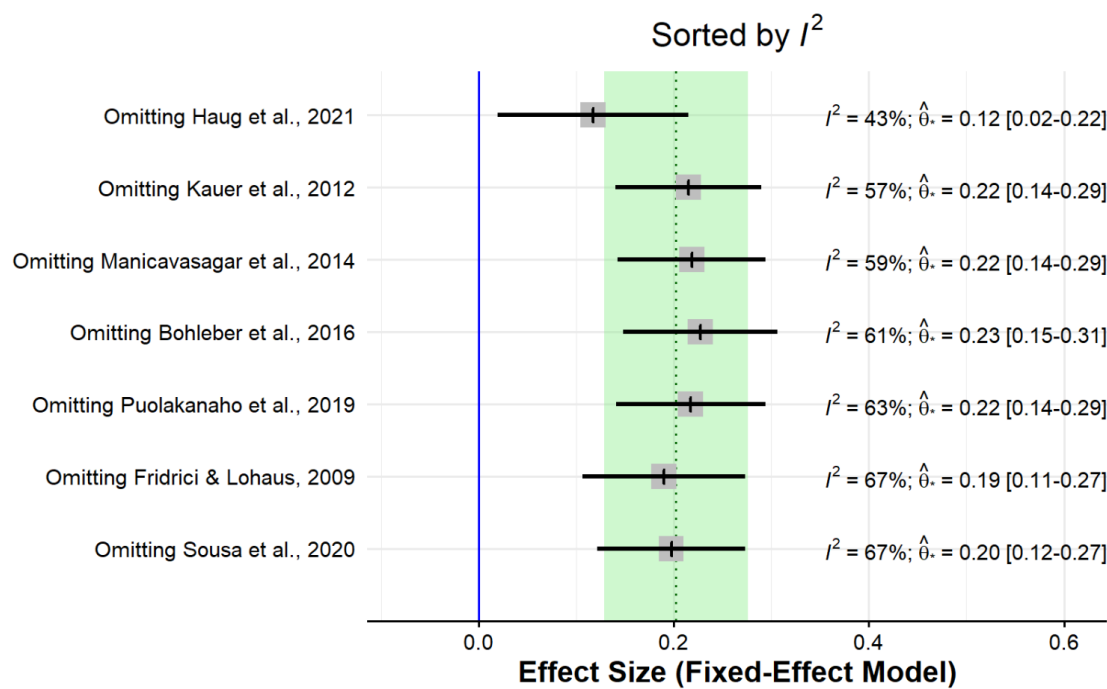

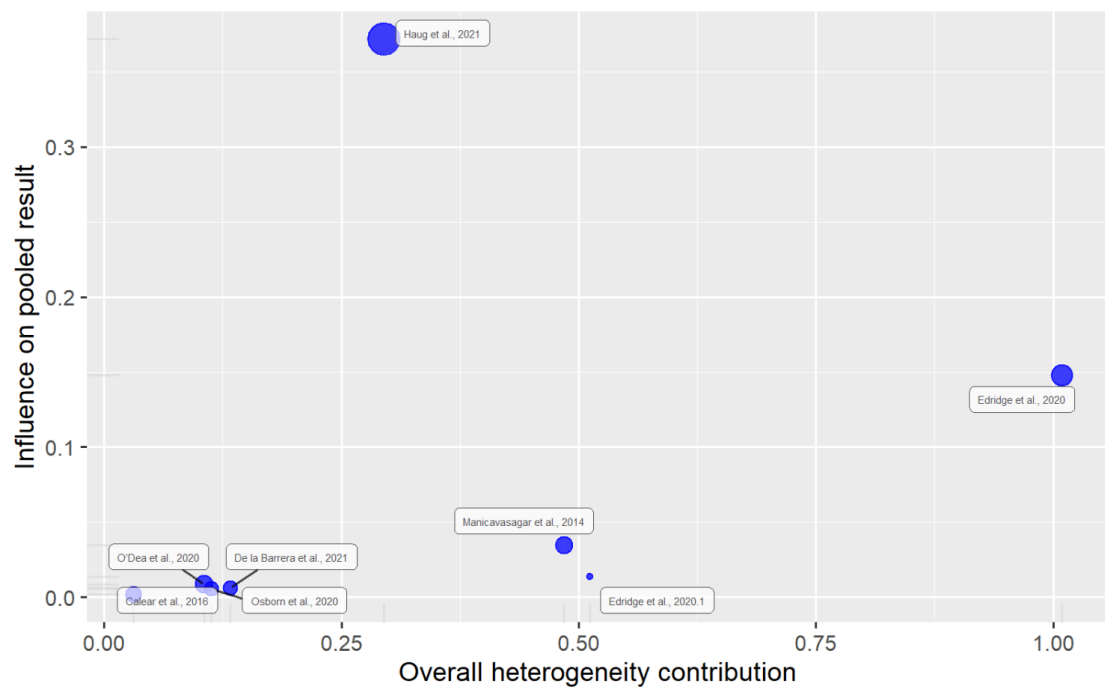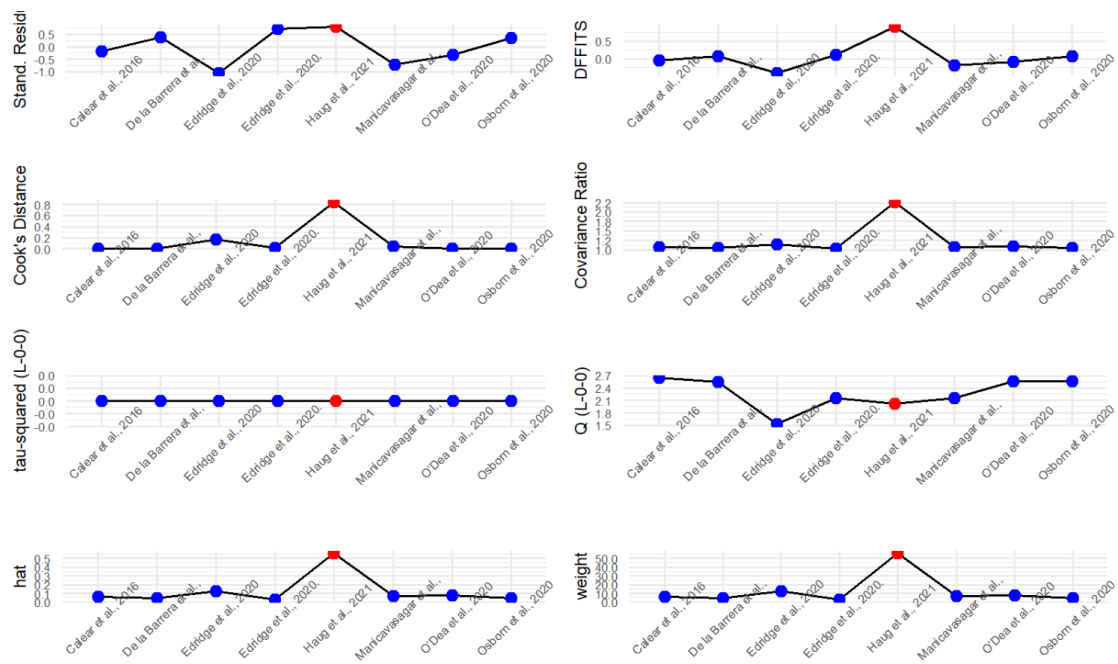

### Sorted by Effect Size

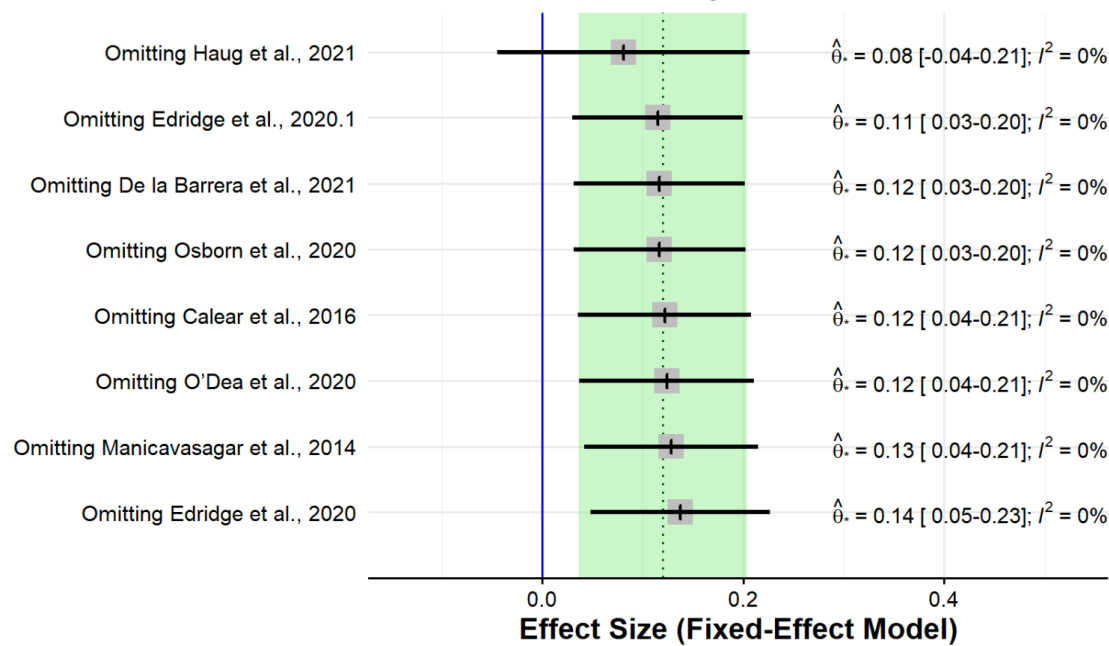

### Sorted by $I^2$

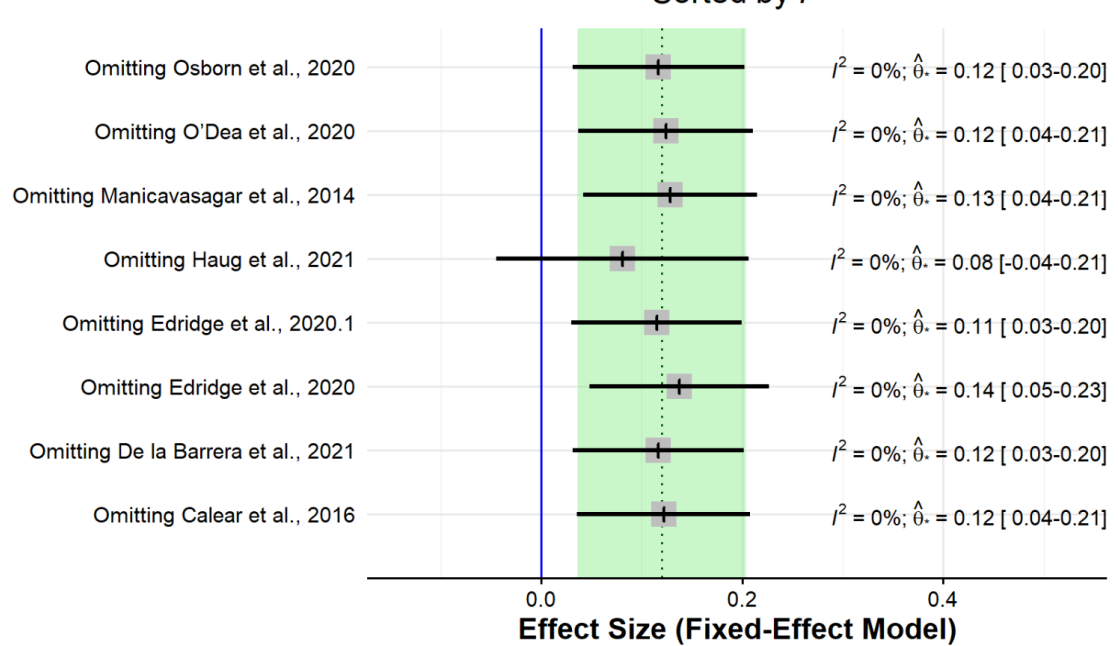

Supplement: MOESM5 [file 24007536]
